# Supplementary material for: Enhancing Specific Energy and Power in Asymmetric Supercapacitors - A Synergetic Strategy based on the Use of Redox Additive Electrolytes
Source: PubMed Central journal article supplement (PMC4868987; doi:10.1038/srep25793), 2016-05-17
Supplement: srep25793-s1.pdf [file srep25793-s1.pdf]

## **Supplementary Information**

# **Enhancing Specific Energy and Power in Asymmetric Supercapacitors - A Synergetic Strategy based on the Use of Redox Additive Electrolytes**

*By Arvinder Singh, Amreesh Chandra\**

[\*] Dr. A. Chandra

Department of Physics,

Indian Institute of Technology Kharagpur, Kharagpur-721302, West Bengal, India

E-mail: [achandra@phy.iitkgp.ernet.in](mailto:achandra@phy.iitkgp.ernet.in)

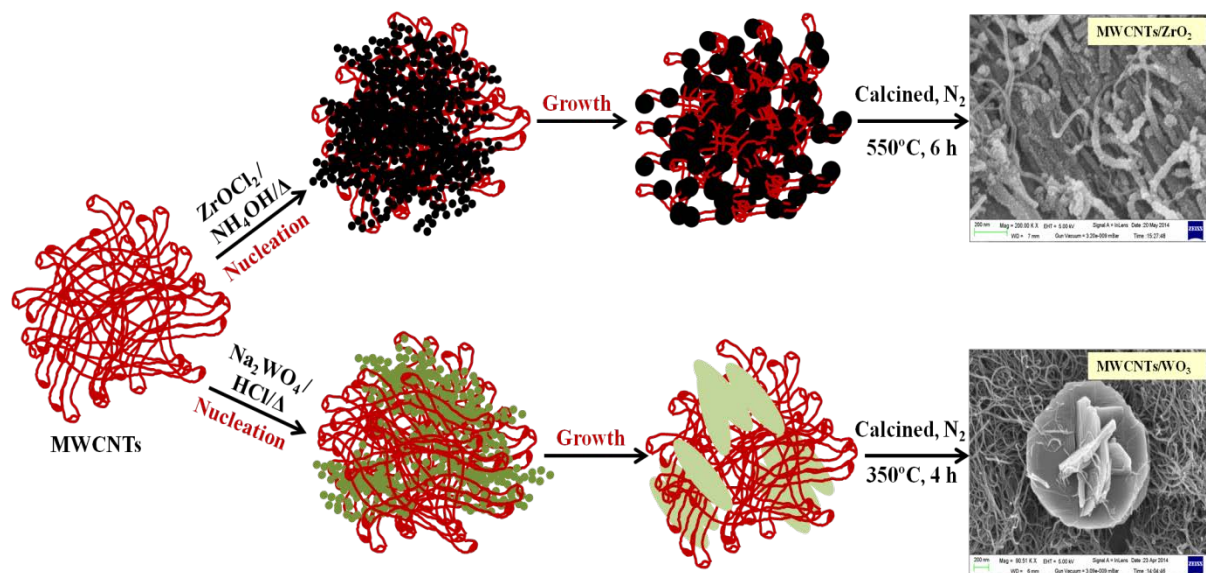

*Fig. S1. Theoretically conceptualized scheme showing the steps in the synthesis of MWZ and*

*MWW composite materials*

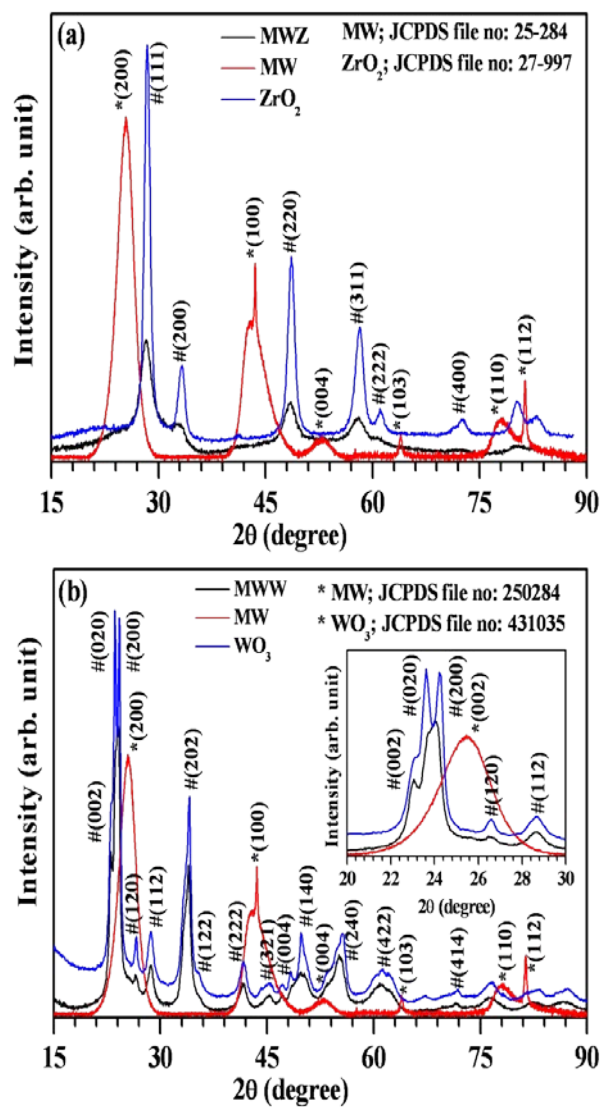

Fig. S2. XRD patterns observed for (a) MWCNTs, ZrO<sub>2</sub> and MWZ, (b) MWCNTs, WO<sub>3</sub> and MWW samples

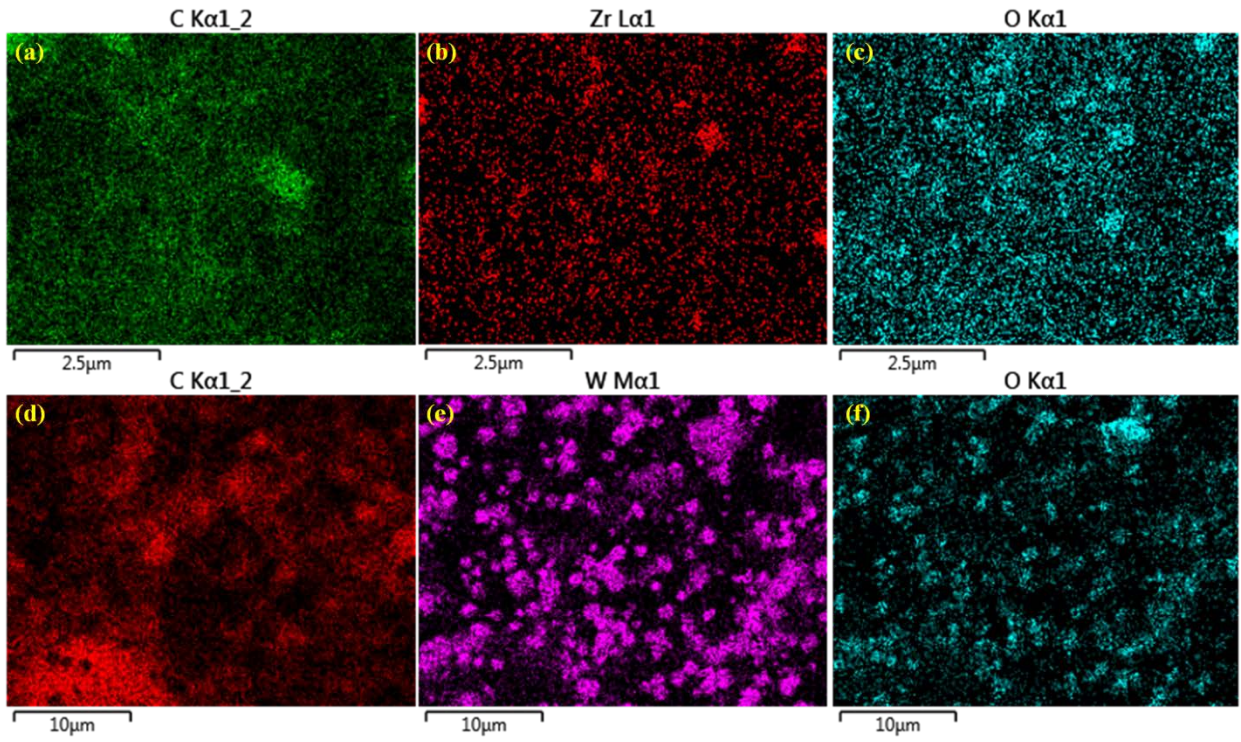

*Fig. S3. Focused ion beam (FIB) elemental maps for (a) MWZ and (b) MWW composite, respectively*

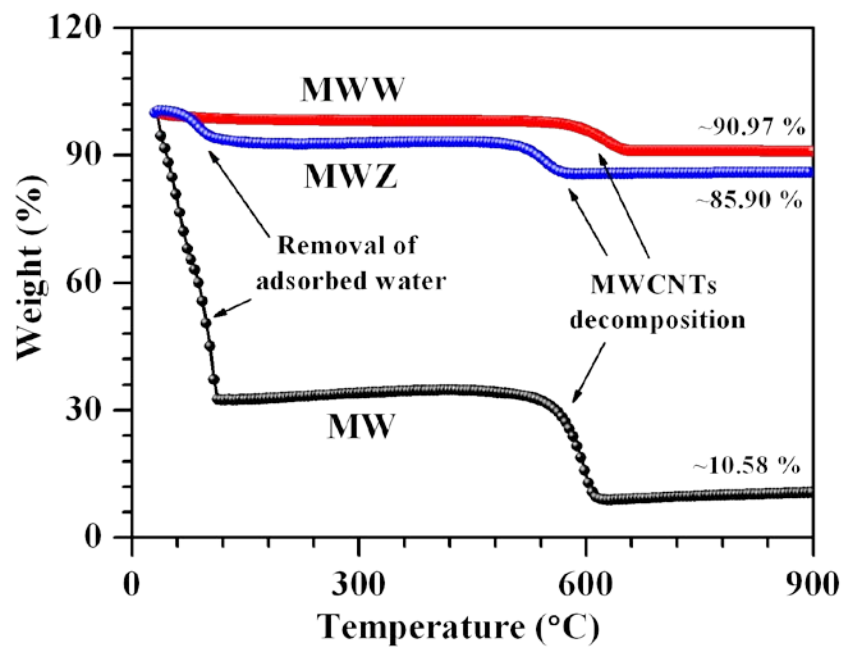

Fig. S4. Thermogravimetric analysis (TGA) curves for MWCNTs, MWZ and MWW samples

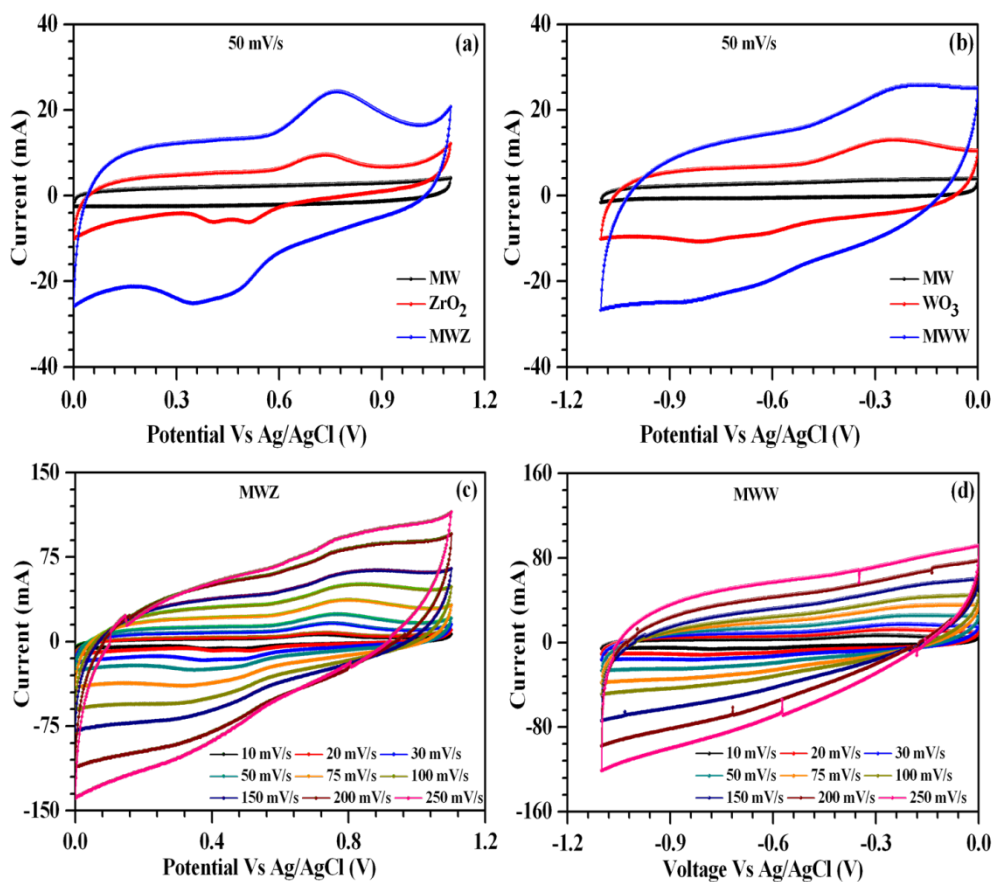

Fig. S5. Three electrode CV curves observed with Ag/AgCl (sat. KCl) as reference and Pt as counter electrode at a scan rate of 50 mV/sec for (a) MWCNTs, ZrO<sub>2</sub> and MWZ, (b) MWCNTs, WO<sub>3</sub> and MWW samples; CVs at different scan rates for (c) MWZ and (d) MWW composite material in aq. 1M Li<sub>2</sub>SO<sub>4</sub> electrolyte

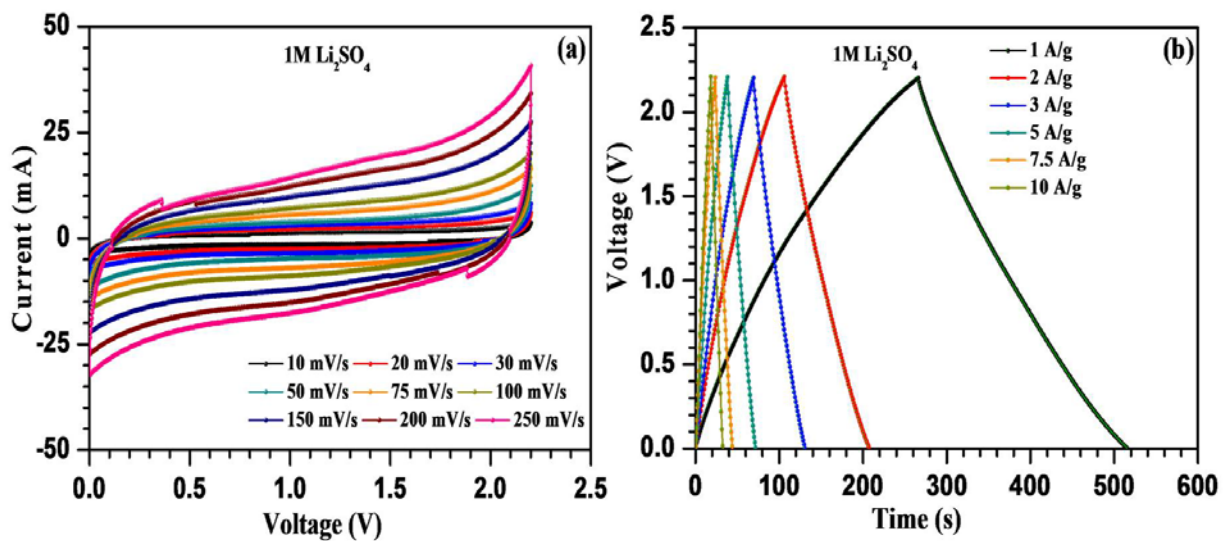

Fig. S6. (a) Two electrode CV curves observed at different scan rates (b) Galvanostatic charge-discharge curves for ASCs assembled in pure 1M Li<sub>2</sub>SO<sub>4</sub> aq. electrolyte



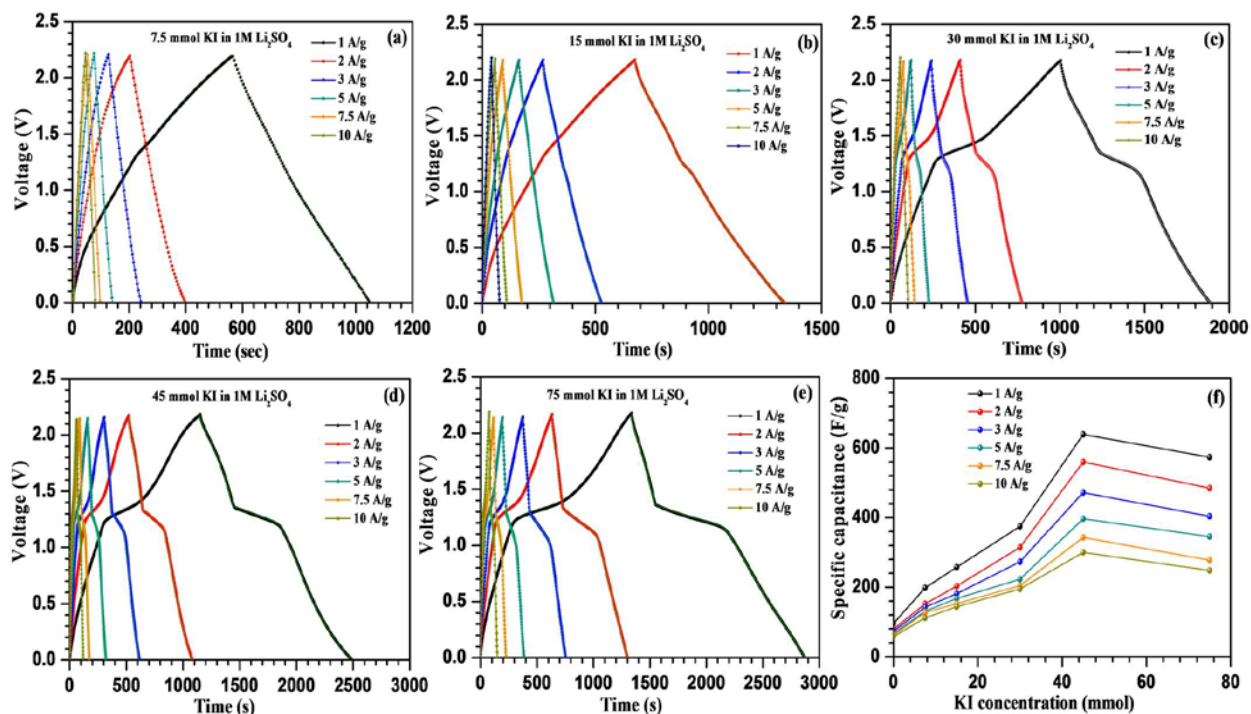

Fig. S7. Two electrode charge-discharge curves observed at different specific currents for ASCs assembled in (a) 7.5 mmol (b) 15 mmol (c) 30 mmol (d) 45 mmol and (e) 75 mmol KI added aq. 1M Li<sub>2</sub>SO<sub>4</sub> electrolyte; (f) variation of specific capacitance at various specific currents for different KI concentrations



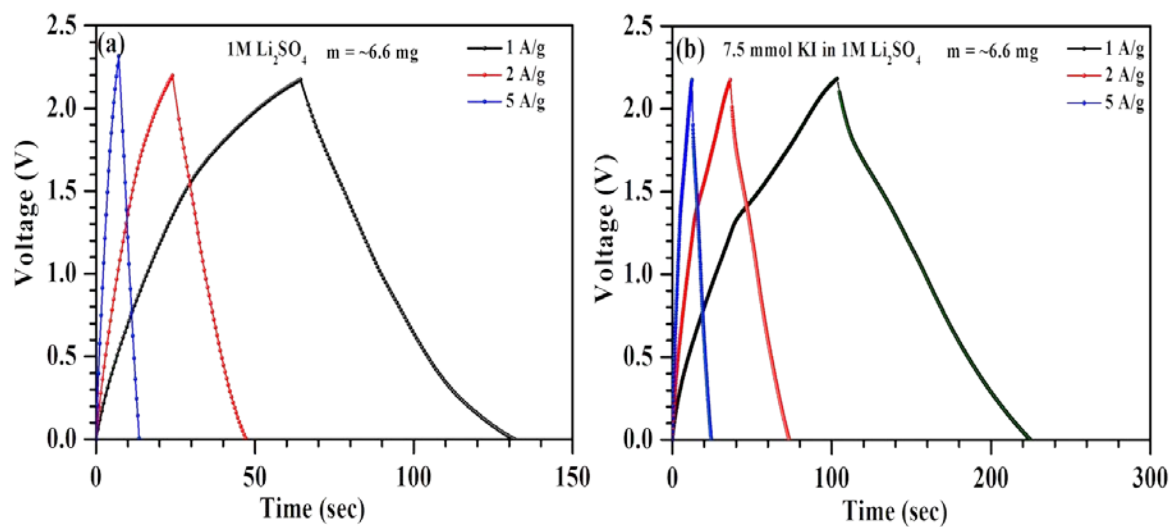

*Fig. S8. Two electrode galvanostatic charge-discharge curves observed at different specific currents for ASCs with higher mass loading assembled in (a) pure and (b) 7.5 mmol KI added electrolyte systems.*

**Table S1:** Various fitting parameters obtained from the equivalent circuit of Nyquist plots

| <b>Electrolyte</b>                     | <b>R<sub>s</sub></b> | <b>R<sub>ct</sub></b> | <b>W<sub>o</sub></b> | <b>CPE</b>  |
|----------------------------------------|----------------------|-----------------------|----------------------|-------------|
| <b>1M Li<sub>2</sub>SO<sub>4</sub></b> | 0.341 ohm            | 0.017 ohm             | 0.38                 | Q = 0.00078 |
| <b>7.5 mmol KI addition</b>            | 0.336 ohm            | 0.023 ohm             | 0.57                 | Q = 0.00097 |
| <b>15 mmol KI addition</b>             | 0.295 ohm            | 0.027 ohm             | 0.62                 | Q = 0.00126 |

**Table S2:** Performance comparison of our ASCs with previously reported aqueous ASCs

| ASCs structure                                               | Electrolyte used                       | Operating Voltage [V] | Specific energy [Wh/kg] | Specific power [W/kg] | Cycles and capacitance fade | Reference no   |
|--------------------------------------------------------------|----------------------------------------|-----------------------|-------------------------|-----------------------|-----------------------------|----------------|
| Graphene/MnO <sub>2</sub> /fFWCNTs//activated carbon/fFWCNTs | Na <sub>2</sub> SO <sub>4</sub>        | 2.0                   | 27                      | 130                   | 2000; ~5%                   | 7              |
| Graphene/MnO <sub>2</sub> //Graphene                         | Na <sub>2</sub> SO <sub>4</sub>        | 2.0                   | 30.4                    | 100                   | 1000, 21%                   | 10             |
| Graphene/Ni(OH) <sub>2</sub> //Graphene/RuO <sub>2</sub>     | KOH                                    | 1.5                   | 48.0                    | 230                   | 5000; 8%                    | 12             |
| 3D Porous graphene/MnO <sub>2</sub> //Graphene/Ag            | Na <sub>2</sub> SO <sub>4</sub>        | 1.8                   | 50.8                    | 101.5                 | -                           | 15             |
| Graphene/MnO <sub>2</sub> //Graphene/MoO <sub>3</sub>        | Na <sub>2</sub> SO <sub>4</sub>        | 2.0                   | 42.6                    | 276                   | 1000; -                     | 17             |
| CoO/Polypyrrole//Activated carbon                            | NaOH                                   | 1.8                   | 43.5                    | 87.5                  | 20000; 8.5%                 | 47             |
| Ni(OH) <sub>2</sub> /Graphene//Graphene                      | KOH                                    | 1.6                   | 77.8                    | 174.7                 | 3000; 5.7%                  | 48             |
| NiMoO <sub>4</sub> //Activated carbon                        | KOH                                    | 1.7                   | 60.9                    | 850                   | 10000; 4.3%                 | 49             |
| NiCoAl-LDH//Activated carbon                                 | KOH                                    | 1.6                   | 58.9                    | 400                   | 10000; 3%                   | 50             |
| CNTs/Ni(OH) <sub>2</sub> //rGO                               | KOH                                    | 1.8                   | 35                      | 1800                  | -                           | 51             |
| <b>ZrO<sub>2</sub>/MWCNT//WO<sub>3</sub>/MWCNT</b>           | <b>Li<sub>2</sub>SO<sub>4</sub></b>    | <b>2.2</b>            | <b>~65</b>              | <b>~950</b>           | <b>1000; ~7%</b>            | <b>Present</b> |
| <b>ZrO<sub>2</sub>/MWCNT//WO<sub>3</sub>/MWCNT</b>           | <b>Li<sub>2</sub>SO<sub>4</sub>+KI</b> | <b>2.2</b>            | <b>~133</b>             | <b>~898</b>           | <b>1000; ~10%</b>           | <b>Present</b> |
